# Supplementary material for: Self-assembly of highly luminescent heteronuclear coordination cages
Source: Royal Society of Chemistry journal article supplement (doi:10.1039/c6dt02708c), 2016-01-01
Supplement: c6dt02708c1.pdf [file c6dt02708c1.pdf]

## Supporting Info

### Content:

1. Experimental section
  - 1.1 General remarks
  - 1.2 Synthetic procedures
2. NMR spectra
3.  $^1\text{H}$  DOSY NMR spectroscopy
4. Crystallographic details
5. Computational details
6. UV/vis, excitation and emission spectroscopy

## 1. Experimental section

### 1.1 General remarks

All reagents were purchased from commercial sources and used without further purification. Chromatographic separations were performed using silica gel (63-200  $\mu\text{m}$ ). NMR spectra were recorded with a Bruker Avance DPX 400 or a Bruker Avance III 400 or a Bruker Avance I 500 spectrometer at a temperature of 298 K. The spectra were referenced to the residual  $^1\text{H}$  and  $^{13}\text{C}\{^1\text{H}\}$  signals of the solvents in parts per million (ppm). Abbreviations for NMR multiplicities are: singlet (s), doublet (d), triplet (t), multiplet (m). Coupling constants  $J$  are given in Hz. Electrospray ionization mass spectra (ESI-MS) were obtained on a Bruker HR-QTOF maXisPlus or Thermo Scientific LCQ/Fleet mass spectrometer. UV/vis absorption spectra were acquired with a Jasco V-550 UV/vis spectrometer. Emission spectra and quantum yields were measured on a Hamamatsu Absolute PL Quantum Yield C11347 spectrometer.  $[\text{Ru}(\text{terpy})(\text{terpy}-4\text{-COOH})](\text{PF}_6)_2$  **R1**,<sup>1</sup> ligand **L-NH<sub>2</sub>**,<sup>2</sup> **C-NH<sub>2</sub>**,<sup>2</sup> and 4'-methyl-2,2'-bipyridine-4-propionic acid<sup>3</sup> were prepared according to literature procedures.

### 1.2 Synthetic procedures

Ligand **L1**:

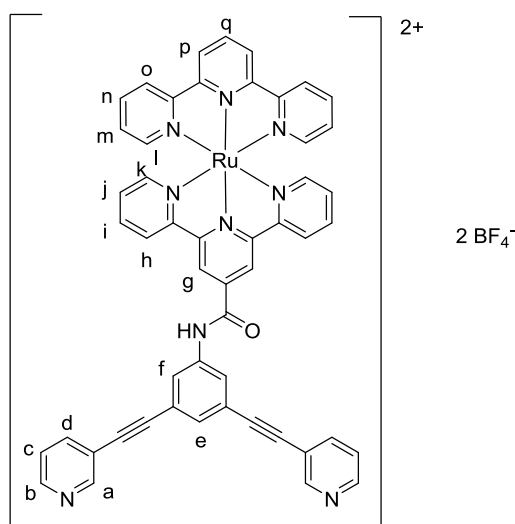

A mixture of  $[\text{Ru}(\text{terpy})(\text{terpy}-\text{COOH})](\text{PF}_6)_2$  **R1** (180 mg, 0.2 mmol, 1 equiv.), ligand **L-NH<sub>2</sub>** (59.1 mg, 0.2 mmol, 1 equiv.), 2-chloro-1-methylpyridinium iodide (CMPI, 204 mg, 0.8 mmol, 4 equiv.) and 4-(dimethylamino)pyridine (DMAP, 244 mg, 2.0 mmol, 10 equiv.) in dry DMF (10 mL) was stirred under an argon atmosphere at 130 °C for 24 h. Dichloromethane (50 mL) was added to the reaction mixture and the organic phase was extracted five times with water (40 mL). The organic phase was dried over  $\text{MgSO}_4$  and concentrated under reduced pressure. After precipitation by addition of diethyl ether to the DMF residue, the red solid was filtered, dissolved in acetonitrile and further purified by column chromatography (acetonitrile/water/ $\text{KNO}_3(\text{sat.}) = 7:1:1$ ). The collected band was reduced in volume and treated with  $\text{NaBF}_4$  to precipitate the product. The precipitate was filtered, washed with water and

diethyl ether and dried under reduced pressure to give ligand **L1** as red solid (146 mg, 0.14 mmol, 68%).

**<sup>1</sup>H NMR** (400 MHz, CD<sub>3</sub>CN):  $\delta$ [ppm] = 10.62 (s, 1 H, NH), 9.34 (s, 2 H, H<sub>g</sub>), 8.81 (d,  $J$  = 1.6 Hz, 2 H, H<sub>a</sub>), 8.76 (d,  $J$  = 8.2 Hz, 2 H, H<sub>p</sub>), 8.70 (d,  $J$  = 8.1 Hz, 2 H, H<sub>h</sub>), 8.60 (dd,  $J$  = 4.9, 1.6 Hz, 2 H, H<sub>b</sub>), 8.49 (d,  $J$  = 8.1 Hz, 2 H, H<sub>o</sub>), 8.44 (t,  $J$  = 8.3 Hz, 1 H, H<sub>q</sub>), 8.27 (s, 2 H, H<sub>i</sub>), 7.98-7.90 (m, 6 H, H<sub>i</sub>/H<sub>n</sub>/H<sub>d</sub>), 7.65 (s, 1 H, H<sub>e</sub>), 7.43-7.36 (m, 6 H, H<sub>k</sub>/H<sub>l</sub>/H<sub>c</sub>), 7.22-7.15 (m, 4 H, H<sub>j</sub>/H<sub>m</sub>).

**DOSY NMR** (400 MHz, CD<sub>3</sub>CN):  $\log D$  = -9.16.

**<sup>13</sup>C NMR** (101 MHz, CD<sub>3</sub>CN):  $\delta$ [ppm] = 164.1, 158.8, 158.6, 156.9, 155.9, 153.6, 153.5, 153.0, 150.3, 142.1, 141.6, 140.2, 139.6, 139.3, 137.4, 131.6, 128.8, 128.5, 125.7, 125.5, 124.8, 124.8, 124.5, 124.5, 122.7, 120.5, 91.6, 88.1.

**<sup>11</sup>B NMR** (128 MHz, CD<sub>3</sub>CN):  $\delta$ [ppm] = -1.18.

**<sup>19</sup>F NMR** (377 MHz, CD<sub>3</sub>CN):  $\delta$ [ppm] = -151.58 (<sup>10</sup>BF<sub>4</sub><sup>-</sup>), -151.64 (<sup>11</sup>BF<sub>4</sub><sup>-</sup>).

**MS** (ESI, MeCN):  $m/z$  = 444.78 [M - 2BF<sub>4</sub><sup>-</sup>]<sup>2+</sup> (calcd for RuC<sub>51</sub>H<sub>33</sub>N<sub>9</sub>O: 444.60), 976.04 [M - BF<sub>4</sub><sup>-</sup>]<sup>+</sup> (calcd for RuC<sub>51</sub>H<sub>33</sub>N<sub>9</sub>OBF<sub>4</sub>: 976.19).

### Cage **C1**:

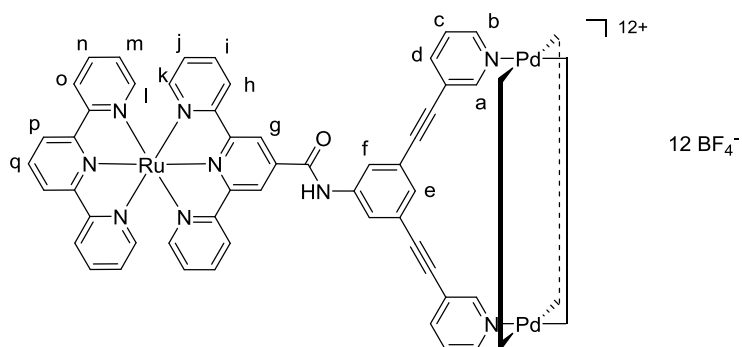

A solution of [Pd(NCCH<sub>3</sub>)<sub>4</sub>](BF<sub>4</sub>)<sub>2</sub> (6.7 mg, 15  $\mu$ mol, 2 equiv.) and ligand **L1** (32 mg, 30  $\mu$ mol, 4 equiv.) in DMSO (1 mL) was stirred at r.t. for one hour. After precipitation by addition of acetone and diethyl ether, the solid was filtered and washed with diethyl ether to yield the cage compound **C1** as red solid (24 mg, 5  $\mu$ mol, 67%).

**<sup>1</sup>H NMR** (400 MHz, CD<sub>3</sub>CN):  $\delta$ [ppm] = 9.92 (s, 1 H, NH), 9.65 (s, 2 H, H<sub>a</sub>), 9.25-9.17 (m, 4 H, H<sub>b</sub>/H<sub>g</sub>), 8.76 (d,  $J$  = 8.0 Hz, 2 H, H<sub>p</sub>), 8.65 (d,  $J$  = 7.6 Hz, 2 H, H<sub>h</sub>), 8.50-8.42 (m, 3 H, H<sub>o</sub>/H<sub>q</sub>), 8.35 (s, 2 H, H<sub>i</sub>), 8.23 (d,  $J$  = 7.9 Hz, 2 H, H<sub>d</sub>), 7.96-7.87 (m, 5 H, H<sub>i</sub>/H<sub>n</sub>/H<sub>e</sub>), 7.72 (dd,  $J$  = 7.9, 5.8 Hz, 2 H, H<sub>c</sub>), 7.38 (d,  $J$  = 5.9 Hz, 2 H, H<sub>k</sub>), 7.33 (d,  $J$  = 5.3 Hz, 2 H, H<sub>l</sub>), 7.20 (dd,  $J$  = 7.1, 5.6 Hz, 2 H, H<sub>j</sub>), 7.12 (dd,  $J$  = 7.2, 5.2 Hz, 2 H, H<sub>m</sub>).

**DOSY NMR** (400 MHz, CD<sub>3</sub>CN):  $\log D = -9.49$ .

**<sup>13</sup>C NMR** (101 MHz, CD<sub>3</sub>CN):  $\delta$ [ppm] = 158.8, 158.5, 156.9, 155.9, 154.2, 153.6, 153.5, 153.4, 151.3, 139.4, 139.3, 139.2, 139.1, 128.8, 128.5, 128.4, 125.7, 125.5, 125.5, 124.8, 124.6, 124.1, 122.5, 94.7, 85.8.

**<sup>11</sup>B NMR** (128 MHz, CD<sub>3</sub>CN):  $\delta$ [ppm] = -1.06.

**<sup>19</sup>F NMR** (377 MHz, CD<sub>3</sub>CN):  $\delta$ [ppm] = -151.04 (<sup>10</sup>BF<sub>4</sub><sup>-</sup>), -151.09 (<sup>11</sup>BF<sub>4</sub><sup>-</sup>).

**MS** (ESI, MeCN):  $m/z = 715.1$  [M - 6BF<sub>4</sub><sup>-</sup>]<sup>6+</sup> (calcd for Pd<sub>2</sub>C<sub>204</sub>H<sub>132</sub>N<sub>36</sub>O<sub>4</sub>Ru<sub>4</sub>B<sub>6</sub>F<sub>24</sub>: 714.9), 875.1 [M - 5BF<sub>4</sub><sup>-</sup>]<sup>5+</sup> (calcd for Pd<sub>2</sub>C<sub>204</sub>H<sub>132</sub>N<sub>36</sub>O<sub>4</sub>Ru<sub>4</sub>B<sub>7</sub>F<sub>28</sub>: 875.3), 1116.2 [M - 4BF<sub>4</sub><sup>-</sup>]<sup>4+</sup> (calcd for Pd<sub>2</sub>C<sub>204</sub>H<sub>132</sub>N<sub>36</sub>O<sub>4</sub>Ru<sub>4</sub>B<sub>8</sub>F<sub>32</sub>: 1115.9).

[Ru(bipy)<sub>2</sub>(bipy-4'-CH<sub>3</sub>-4-(CH<sub>2</sub>)<sub>2</sub>-COOH)](PF<sub>6</sub>)<sub>2</sub> **R2**:

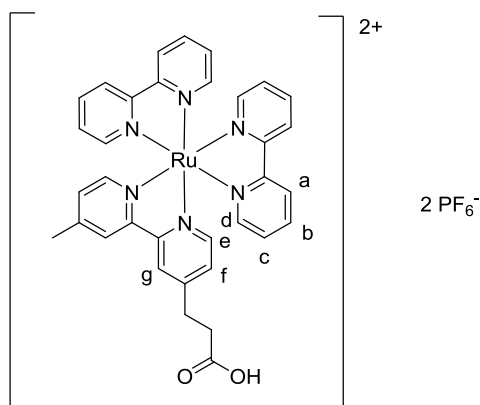

[RuCl<sub>2</sub>(bipy)<sub>2</sub>] (484 mg, 1 mmol, 1 equiv.) and 4'-methyl-2,2'-bipyridine-4-propionic acid (242 mg, 1 mmol, 1 equiv.) were dissolved in dry ethanol (15 mL). The mixture was heated to reflux under an argon atmosphere for 16 h. After cooling to r.t., the solvent was removed under reduced pressure and the residue dissolved in water. The red solution was treated with KPF<sub>6</sub>, the resulting precipitate was filtered, washed with water and chloroform and dried under reduced pressure to obtain the Ru complex **R2** as orange solid (455 mg, 0.5 mmol, 48%).

**<sup>1</sup>H NMR** (400 MHz, CD<sub>3</sub>CN):  $\delta$ [ppm] = 8.48 (d,  $J = 7.9$  Hz, 4 H, H<sub>a</sub>), 8.39-8.35 (m, 2 H, H<sub>g</sub>), 8.08-8.00 (m, 4 H, H<sub>b</sub>), 7.75-7.67 (m, 4 H, H<sub>d</sub>), 7.54 (dd,  $J = 14.1, 5.9$  Hz, 2 H, H<sub>e</sub>), 7.43-7.34 (m, 4 H, H<sub>c</sub>), 7.29-7.20 (m, 2 H, H<sub>f</sub>), 3.06 (t,  $J = 7.1$  Hz, 2 H, CH<sub>2</sub>), 2.74 (t,  $J = 7.4$  Hz, 2 H, CH<sub>2</sub>), 2.53 (s, 3 H, CH<sub>3</sub>).

**<sup>13</sup>C NMR** (101 MHz, CD<sub>3</sub>CN):  $\delta$ [ppm] = 158.00, 157.6, 157.4, 154.0, 152.7, 152.6, 152.5, 152.4, 152.0, 151.7, 151.5, 138.6, 138.6, 129.3, 128.5, 128.5, 126.0, 125.2, 125.1, 30.6, 21.2.

**<sup>31</sup>P NMR** (162 MHz, CD<sub>3</sub>CN):  $\delta$ [ppm] = -144.64 (sept,  $J$  = 704 Hz).

**<sup>19</sup>F NMR** (377 MHz, CD<sub>3</sub>CN):  $\delta$ [ppm] = -72.87 (d,  $J$  = 704 Hz).

**MS** (ESI, MeCN):  $m/z$  = 328.24 [ $M - 2PF_6^-$ ]<sup>2+</sup> (calcd for RuC<sub>34</sub>H<sub>30</sub>N<sub>6</sub>O<sub>2</sub>: 328.08), 801.08 [ $M - PF_6^-$ ]<sup>+</sup> (calcd for RuC<sub>54</sub>H<sub>41</sub>N<sub>9</sub>OPF<sub>6</sub>: 801.11).

Ligand **L2**:

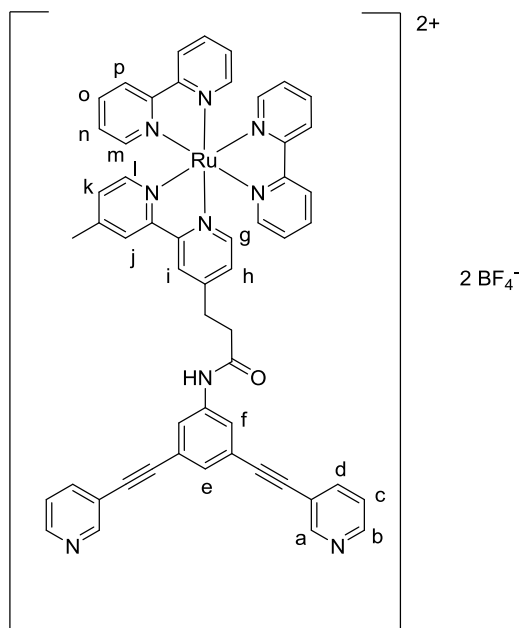

A mixture of Ru complex **R2** (378 mg, 0.4 mmol, 1 equiv.), ligand **L-NH<sub>2</sub>** (118 mg, 0.4 mmol, 1 equiv.), CMPI (409 mg, 1.6 mmol, 4 equiv.) and DMAP (489 mg, 4.0 mmol, 10 equiv.) in dry DMF (15 mL) was stirred under an argon atmosphere at 130 °C for 24 h. Dichloromethane (50 mL) was added to the reaction mixture and the organic phase was extracted five times with water (40 mL). The organic phase was dried over MgSO<sub>4</sub> and concentrated under reduced pressure. After precipitation by addition of diethyl ether to the DMF residue, the red solid was filtered, dissolved in acetonitrile and further purified by column chromatography (acetonitrile/KNO<sub>3</sub>(sat.) = 10:1). The collected band was reduced in volume and treated with NaBF<sub>4</sub> to precipitate the product. The precipitate was filtered, washed with water and diethyl ether and dried under reduced pressure to give ligand **L2** as orange solid (248 mg, 0.22 mmol, 56%).

**<sup>1</sup>H NMR** (400 MHz, CD<sub>3</sub>CN):  $\delta$ [ppm] = 8.95 (s, 1 H, NH), 8.72 (d,  $J$  = 1.6 Hz, 2 H, H<sub>a</sub>), 8.58 (dd,  $J$  = 4.7, 1.6 Hz, 2 H, H<sub>b</sub>), 8.48-8.43 (m, 4 H, H<sub>p</sub>), 8.42 (s, 1 H, H<sub>i</sub>), 8.35 (s, 1 H, H<sub>j</sub>), 8.04-7.97 (m, 4 H, H<sub>o</sub>), 7.87 (dt,  $J$  = 7.8, 1.6 Hz, 2 H, H<sub>d</sub>), 7.74-7.69 (m, 6 H, H<sub>f</sub>/H<sub>m</sub>), 7.57 (d,  $J$  = 5.8 Hz, 1 H, H<sub>g</sub>), 7.50 (d,  $J$  = 5.8 Hz, 1 H, H<sub>i</sub>), 7.44 (s, 1 H, H<sub>e</sub>), 7.41-7.34 (m, 6 H, H<sub>c</sub>/H<sub>n</sub>), 7.31 (dd,

$J = 1.6, 5.8$  Hz, 1 H,  $H_h$ ), 7.20 (dd,  $J = 1.6, 5.4$  Hz, 1 H,  $H_k$ ), 3.18 (t,  $J = 7.1$  Hz, 2 H,  $\text{CH}_2$ ), 2.82 (t,  $J = 7.0$  Hz, 2 H,  $\text{CH}_2$ ), 2.50 (s, 3 H,  $\text{CH}_3$ ).

**DOSY NMR** (400 MHz,  $\text{CD}_3\text{CN}$ ):  $\log D = -9.16$ .

**$^{13}\text{C}$  NMR** (101 MHz,  $\text{CD}_3\text{CN}$ ):  $\delta$ [ppm] = 171.5, 158.0, 157.9, 157.6, 157.4, 154.0, 152.9, 152.7, 152.6, 152.5, 152.0, 151.7, 151.5, 150.2, 140.6, 139.5, 138.6, 130.3, 129.3, 128.7, 128.5, 128.4, 126.0, 125.3, 125.2, 125.1, 124.4, 124.3, 123.4, 120.5, 91.7, 87.6, 37.4, 31.3, 21.3.

**$^{11}\text{B}$  NMR** (128 MHz,  $\text{CD}_3\text{CN}$ ):  $\delta$ [ppm] = -1.16.

**$^{19}\text{F}$  NMR** (377 MHz,  $\text{CD}_3\text{CN}$ ):  $\delta$ [ppm] = -151.53 ( $^{10}\text{BF}_4^-$ ), -151.59 ( $^{11}\text{BF}_4^-$ ).

**MS** (ESI, MeCN):  $m/z = 466.96$  [ $\text{M} - 2\text{BF}_4^-$ ] $^{2+}$  (calcd for  $\text{RuC}_{54}\text{H}_{41}\text{N}_9\text{O}$ : 466.63), 1020.21 [ $\text{M} - \text{BF}_4^-$ ] $^+$  (calcd for  $\text{RuC}_{54}\text{H}_{41}\text{N}_9\text{OBF}_4$ : 1020.25).

Cage **C2**:

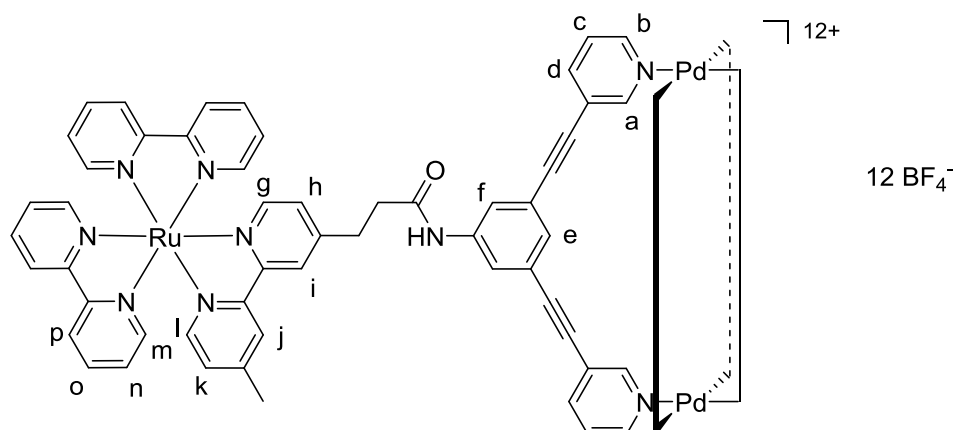

A solution of  $[\text{Pd}(\text{NCCH}_3)_4](\text{BF}_4)_2$  (6.7 mg, 15  $\mu\text{mol}$ , 2 equiv.) and ligand **L2** (33 mg, 30  $\mu\text{mol}$ , 4 equiv.) in DMSO (1 mL) was stirred at r.t. for one hour. After precipitation by addition of acetone and diethyl ether, the solid was filtered and washed with diethyl ether to yield the cage compound **C1** as red solid (28 mg, 6  $\mu\text{mol}$ , 75%).

**$^1\text{H}$  NMR** (400 MHz,  $\text{CD}_3\text{CN}$ ):  $\delta$ [ppm] = 9.58 (s, 2 H,  $H_a$ ), 9.21 (d,  $J = 5.3$  Hz, 2 H,  $H_b$ ), 9.01 (s, 1 H, NH), 8.47-8.39 (m, 6 H,  $H_p/H_i/H_j$ ), 8.08 (d,  $J = 8.1$  Hz, 2 H,  $H_d$ ), 8.04-7.97 (m, 4 H,  $H_o$ ), 7.87 (s, 2 H,  $H_f$ ), 7.69-7.60 (m, 7 H,  $H_c/H_e/H_m$ ), 7.53 (d,  $J = 5.9$  Hz, 1 H,  $H_g$ ), 7.48 (d,  $J = 5.9$  Hz, 1 H,  $H_l$ ), 7.38-7.32 (m, 4 H,  $H_n$ ), 7.26 (d,  $J = 5.9$  Hz, 1 H,  $H_h$ ), 7.19 (d,  $J = 5.7$  Hz, 1 H,  $H_k$ ), 3.12 (t,  $J = 7.5$  Hz, 2 H,  $\text{CH}_2$ ), 2.78 (t,  $J = 7.5$  Hz, 2 H,  $\text{CH}_2$ ), 2.49 (s, 3 H,  $\text{CH}_3$ ).

**DOSY NMR** (400 MHz,  $\text{CD}_3\text{CN}$ ):  $\log D = -9.48$ .

**<sup>13</sup>C NMR** (101 MHz, CD<sub>3</sub>CN):  $\delta$ [ppm] = 171.5, 158.0, 157.9, 157.6, 157.4, 154.2, 153.9, 152.6, 152.5, 152.4, 152.0, 151.6, 151.5, 151.2, 143.8, 140.9, 138.5, 130.2, 129.3, 128.6, 128.5, 128.4, 128.3, 128.2, 125.9, 125.2, 125.1, 125.1, 124.4, 123.6, 94.7, 85.4, 37.2, 31.1, 21.2.

**<sup>11</sup>B NMR** (128 MHz, CD<sub>3</sub>CN):  $\delta$ [ppm] = -1.08.

**<sup>19</sup>F NMR** (377 MHz, CD<sub>3</sub>CN):  $\delta$ [ppm] = -151.18 (<sup>10</sup>BF<sub>4</sub><sup>-</sup>), -151.23 (<sup>11</sup>BF<sub>4</sub><sup>-</sup>).

**MS** (ESI, MeCN):  $m/z$  = 744.3 [M - 6BF<sub>4</sub><sup>-</sup>]<sup>6+</sup> (calcd for Pd<sub>2</sub>C<sub>216</sub>H<sub>164</sub>N<sub>36</sub>O<sub>4</sub>Ru<sub>4</sub>B<sub>6</sub>F<sub>24</sub>: 744.3), 910.6 [M - 5BF<sub>4</sub><sup>-</sup>]<sup>5+</sup> (calcd for Pd<sub>2</sub>C<sub>216</sub>H<sub>164</sub>N<sub>36</sub>O<sub>4</sub>Ru<sub>4</sub>B<sub>7</sub>F<sub>28</sub>: 910.6), 1160.3 [M - 4BF<sub>4</sub><sup>-</sup>]<sup>4+</sup> (calcd for Pd<sub>2</sub>C<sub>216</sub>H<sub>164</sub>N<sub>36</sub>O<sub>4</sub>Ru<sub>4</sub>B<sub>8</sub>F<sub>32</sub>: 1160.0).

## 2. NMR spectra

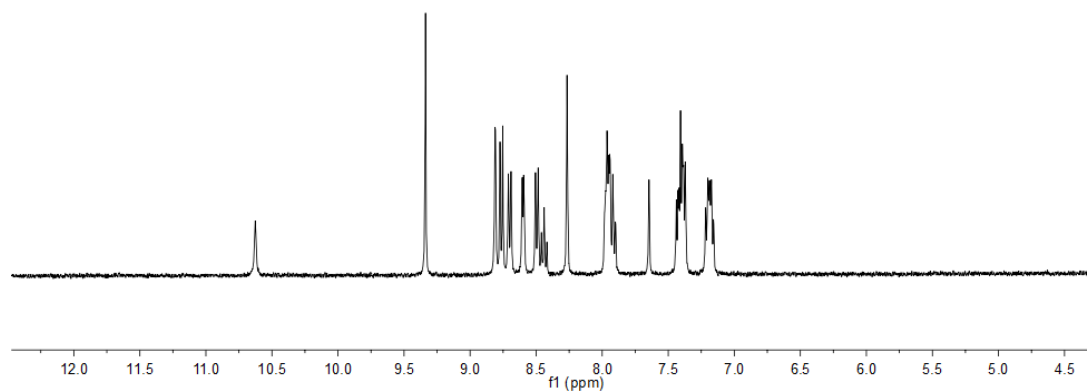

**Figure S1.** <sup>1</sup>H NMR (400 MHz, CD<sub>3</sub>CN) spectrum of ligand L1.

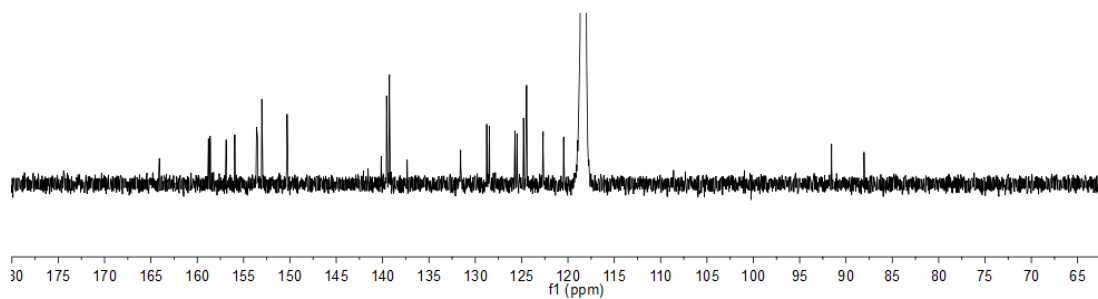

**Figure S2.** <sup>13</sup>C NMR (101 MHz, CD<sub>3</sub>CN) spectrum of ligand L1.

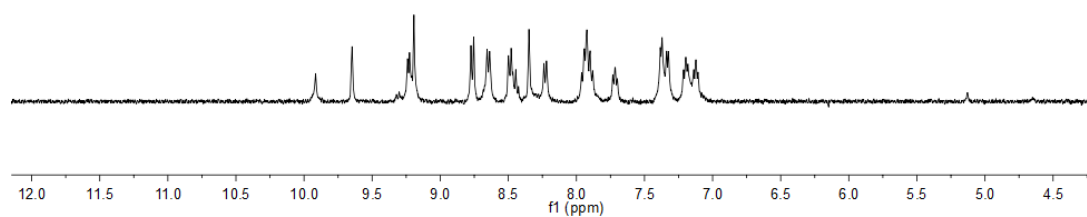

**Figure S3.** <sup>1</sup>H NMR (400 MHz, CD<sub>3</sub>CN) spectrum of ligand C1.



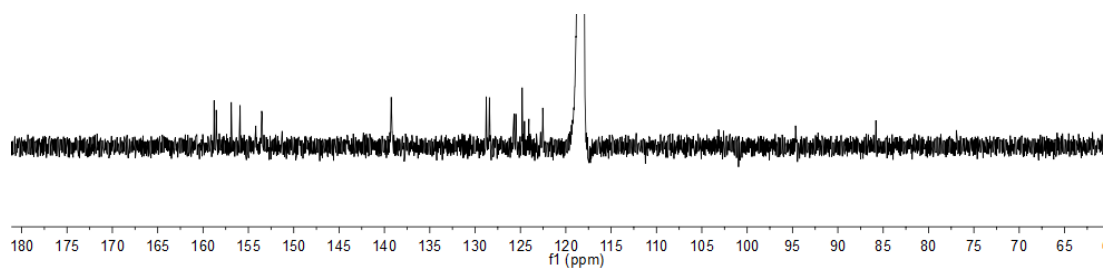

**Figure S4.** <sup>13</sup>C NMR (101 MHz, CD<sub>3</sub>CN) spectrum of ligand **C1**.

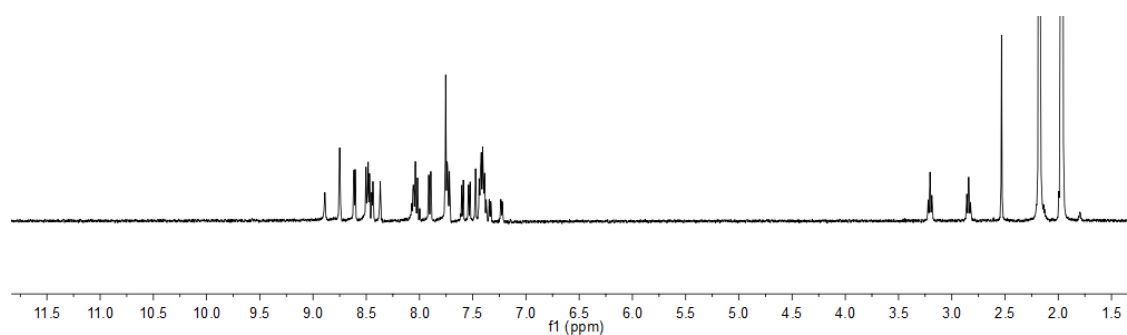

**Figure S5.** <sup>1</sup>H NMR (400 MHz, CD<sub>3</sub>CN) spectrum of ligand **L2**.

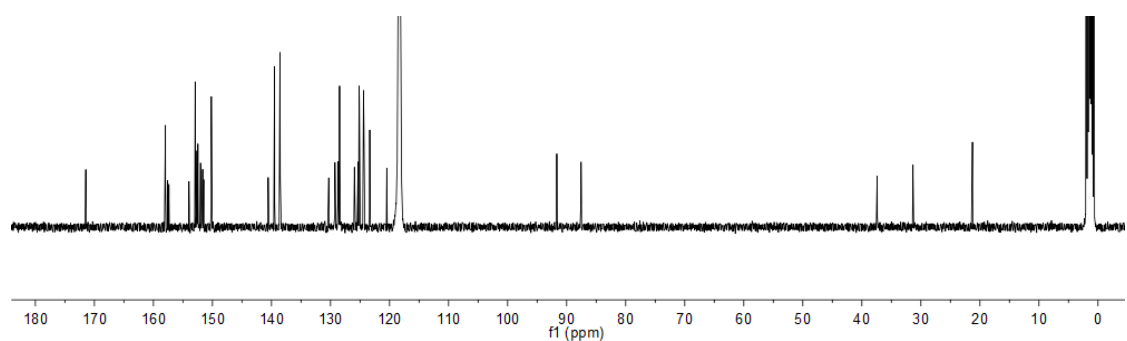

**Figure S6.** <sup>13</sup>C NMR (101 MHz, CD<sub>3</sub>CN) spectrum of ligand **L2**.

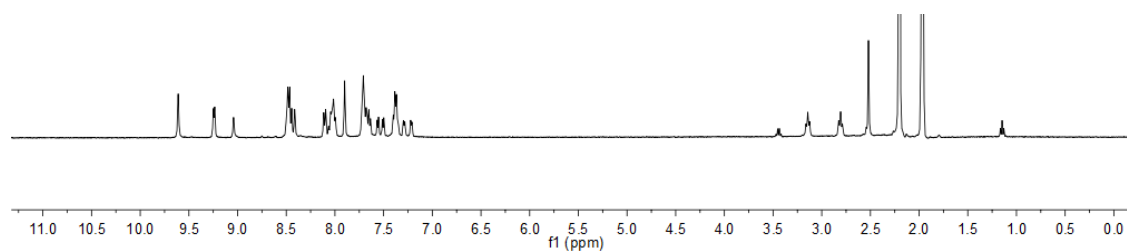

**Figure S7.** <sup>1</sup>H NMR (400 MHz, CD<sub>3</sub>CN) spectrum of ligand **C2**.

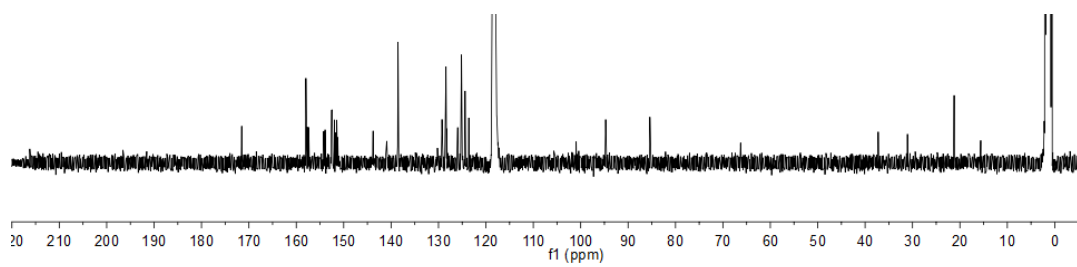

**Figure S8.**  $^{13}\text{C}$  NMR (101 MHz,  $\text{CD}_3\text{CN}$ ) spectrum of ligand **C2**.

### 3. <sup>1</sup>H DOSY NMR spectroscopy

**Table S1.** Comparison of diffusion coefficients ( $D$ ,  $\times 10^{-10} \text{ m}^2 \text{ s}^{-1}$ ) of ligands and palladium cages obtained by <sup>1</sup>H DOSY NMR (400 MHz, CD<sub>3</sub>CN).

| Ligand | D of ligand | Cage | D of cage | Ratio |
|--------|-------------|------|-----------|-------|
| L1     | 6.94        | C1   | 3.27      | 2.12  |
| L2     | 6.91        | C2   | 3.31      | 2.09  |

In diffusion experiments, the molecular size of the metallocages is estimated by the Stokes-Einstein equation:<sup>4</sup>

$$r_s = \frac{k_B \cdot T}{6\pi \cdot \eta \cdot D}$$

With  $r_s$  = hydrodynamic or Stokes radius of the molecule or aggregate being investigated which is assumed to exhibit a spherical shape,  $k_B$  = Boltzmann constant,  $T$  = temperature,  $\eta$  = viscosity of solution,  $D$  = diffusion coefficient.

**Table S2.** Stokes radii  $r_s$  of metallocages obtained by diffusion coefficients with viscosity of acetonitrile = 0.44 mPa·s and a temperature of 298 K.

| Cage | D [ $\times 10^{-10} \text{ m}^2 \text{ s}^{-1}$ ] | $r_s$ [nm] |
|------|----------------------------------------------------|------------|
| C1   | 3.27                                               | 1.52       |
| C2   | 3.31                                               | 1.50       |

#### 4. Crystallographic details

Data were collected on a single-crystal X-ray diffractometer equipped with a CCD detector (Bruker APEX II,  $\kappa$ -CCD), a fine-focus sealed tube with MoK $\alpha$  radiation ( $\lambda = 0.71073 \text{ \AA}$ ) and a graphite monochromator by using the *APEX2* software package.<sup>5</sup> The measurements were performed on a single crystal coated with perfluorinated ether. The crystal was fixed on the top of a glass fiber and transferred to the diffractometer. The crystal was frozen under a stream of cold nitrogen. A matrix scan was used to determine the initial lattice parameters. Reflections were merged and corrected for Lorentz and polarization effects, scan speed, and background using *SAINT*.<sup>6</sup> Absorption corrections, including odd- and even-ordered spherical harmonics were performed using *SADABS*.<sup>6</sup> Space-group assignments were based on systematic absences, *E* statistics, and successful refinement of the structures. Structures were solved by direct methods as implemented in the *APEX2* software package,<sup>5</sup> based on *SHELXS-97*<sup>7</sup> and were refined against all data using *SHELXL*<sup>8</sup> in conjunction with *SHELXL-2014*.<sup>9</sup> Hydrogen atoms were assigned to ideal positions and refined using a riding model with an isotropic thermal parameter 1.2 times that of the attached carbon atom (1.5 times for methyl hydrogen atoms). If not mentioned otherwise, non-hydrogen atoms were refined with anisotropic displacement parameters. Full-matrix least-squares refinements were carried out by minimizing  $\sum w(F_o^2 - F_c^2)^2$  with *SHELXL-97*<sup>10</sup> weighting scheme. Neutral atom scattering factors for all atoms and anomalous dispersion corrections for the non-hydrogen atoms were taken from *International Tables for Crystallography*.<sup>11</sup> Images of the crystal structures were generated by *PLATON*.<sup>12</sup>

CCDC 1484108 (L1) contain the supplementary crystallographic data for this paper. These data can be obtained free of charge from The Cambridge Crystallographic Data Centre via [www.ccdc.cam.ac.uk/data\\_request/cif](http://www.ccdc.cam.ac.uk/data_request/cif).

## Compound L1 (CCDC 1484108)

Suitable single crystals for diffraction experiments of **L1** ( $\text{PF}_6^-$  as counterions) were grown by vapor diffusion of diethyl ether into an acetone solution of the ligand **L1**.

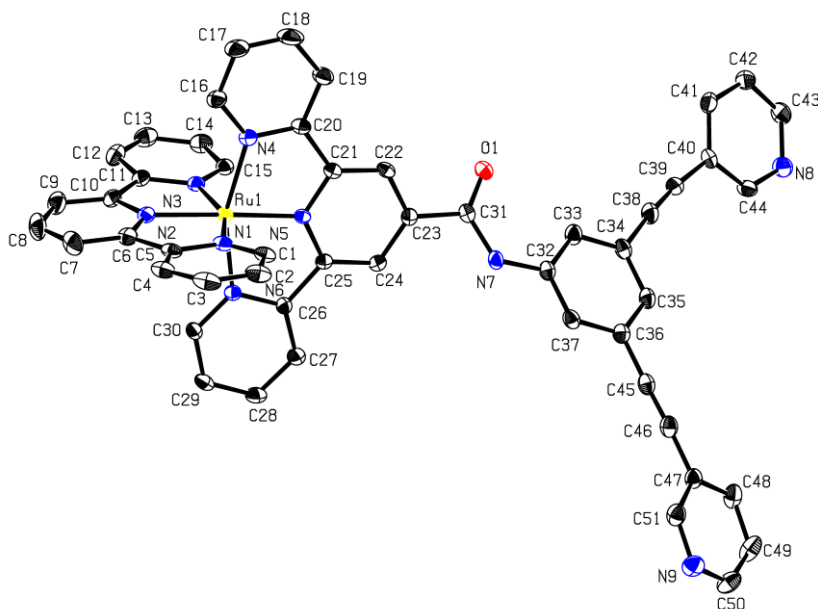

**Figure S9.** ORTEP style representation of the molecular structure of **L1** in the solid state. Ellipsoids are shown at 50% probability. Hydrogen atoms, counterions and solvent molecules are omitted for clarity. Selected bond lengths (Å) and angles (°): Ru1–N1 2.0729(2), Ru1–N2 1.9796(2), Ru1–N3 2.0683(1), Ru1–N4 2.0690(1), Ru1–N5 1.9694(2), Ru1–N6 2.0703(2), C31–N7 1.3631(1).

Diffractometer operator Manuela Hollering

scanspeed 2 s per frame

dx 63 mm XYZ frames measured in XYZ data sets

phi-scans with delta\_phi = 0.5

omega-scans with delta\_omega = 0.5

### *Crystal data*

$\text{C}_{51}\text{H}_{33}\text{N}_9\text{ORu}\cdot 2(\text{F}_6\text{P})\cdot \text{C}_2\text{H}_3\text{N}$

$F(000) = 1228$

$M_r = 1219.93$

|                                |                                                         |
|--------------------------------|---------------------------------------------------------|
| Triclinic, <i>P</i>            | $D_x = 1.602 \text{ Mg m}^{-3}$                         |
| Hall symbol: - <i>P</i> 1      | Melting point: ? K                                      |
| $a = 8.9134 (8) \text{ \AA}$   | Mo $K\alpha$ radiation, $\lambda = 0.71073 \text{ \AA}$ |
| $b = 9.3811 (7) \text{ \AA}$   | Cell parameters from 9450 reflections                   |
| $c = 30.975 (3) \text{ \AA}$   | $\theta = 2.3\text{--}26.0^\circ$                       |
| $\alpha = 95.760 (4)^\circ$    | $\mu = 0.47 \text{ mm}^{-1}$                            |
| $\beta = 97.978 (5)^\circ$     | $T = 100 \text{ K}$                                     |
| $\gamma = 96.792 (4)^\circ$    | Fragment, clear dark red                                |
| $V = 2529.0 (4) \text{ \AA}^3$ | $0.26 \times 0.19 \times 0.15 \text{ mm}$               |
| $Z = 2$                        |                                                         |

*Data collection*

|                                                            |                                                                        |
|------------------------------------------------------------|------------------------------------------------------------------------|
| Bruker APEX-II CCD diffractometer                          | 10330 independent reflections                                          |
| Radiation source: fine-focus sealed tube                   | 8489 reflections with $I > 2\sigma(I)$                                 |
| Triumph Optic monochromator                                | $R_{\text{int}} = 0.061$                                               |
| Detector resolution: 16 pixels $\text{mm}^{-1}$            | $\theta_{\text{max}} = 26.4^\circ$ , $\theta_{\text{min}} = 2.0^\circ$ |
| phi- and $\omega$ -rotation scans                          | $h = -11 \ 11$                                                         |
| Absorption correction: multi-scan<br>SADABS, Bruker, 2008b | $k = -11 \ 11$                                                         |
| $T_{\text{min}} = 0.681$ , $T_{\text{max}} = 0.745$        | $l = -38 \ 38$                                                         |
| 52760 measured reflections                                 |                                                                        |

## Refinement

|                                                                |                                                                                  |
|----------------------------------------------------------------|----------------------------------------------------------------------------------|
| Refinement on $F^2$                                            | Secondary atom site location: difference Fourier map                             |
| Least-squares matrix: full                                     | Hydrogen site location: inferred from neighbouring sites                         |
| $R[F^2 > 2\sigma(F^2)] = 0.038$                                | H-atom parameters constrained                                                    |
| $wR(F^2) = 0.082$                                              | $W = 1/[\Sigma^2(FO^2) + (0.0255P)^2 + 2.5391P]$<br>WHERE $P = (FO^2 + 2FC^2)/3$ |
| $S = 1.03$                                                     | $(\Delta/\sigma)_{\max} = 0.002$                                                 |
| 10330 reflections                                              | $\Delta\rho_{\max} = 0.39 \text{ e } \text{\AA}^{-3}$                            |
| 842 parameters                                                 | $\Delta\rho_{\min} = -0.59 \text{ e } \text{\AA}^{-3}$                           |
| 270 restraints                                                 | Extinction correction: none                                                      |
| ? constraints                                                  | Extinction coefficient: ?                                                        |
| Primary atom site location: structure-invariant direct methods |                                                                                  |

## 5. Computational details

Semi-empirical PM6 calculations implemented in Gaussian09 D.01 were done.<sup>13,14</sup> All obtained geometries have been identified *via* the numbers of negative frequencies as minima (NImag = 0). A text file of all computed molecule Cartesian coordinates in a format for convenient visualization is included. Calculated bond lengths and angles correspond well to data obtained from the crystal structure.

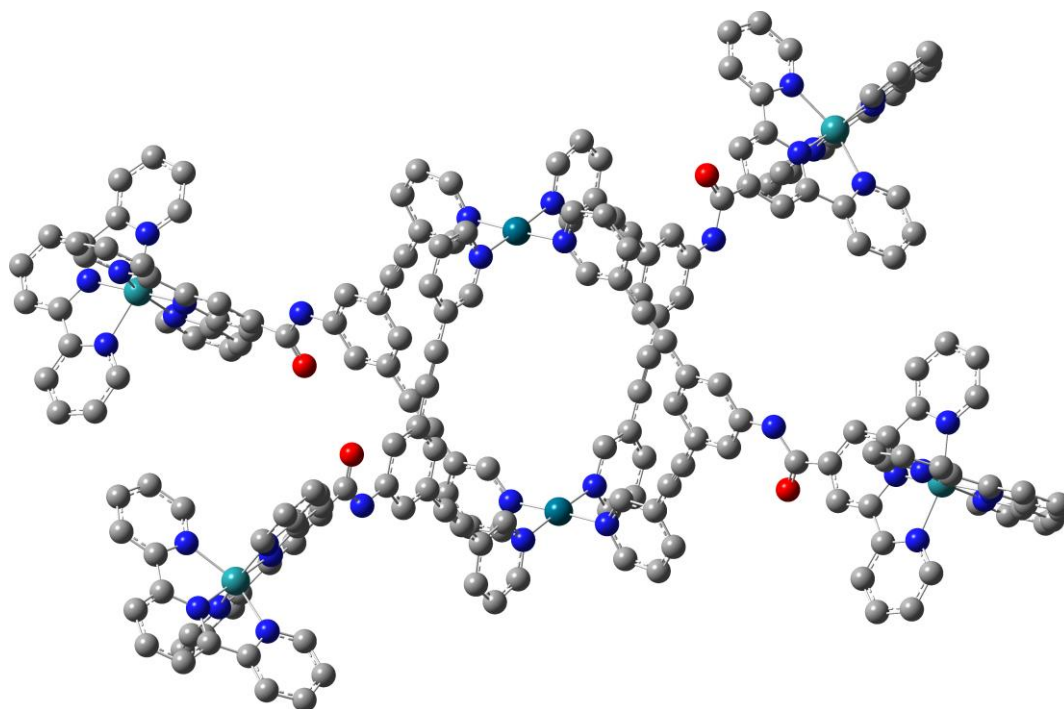

**Figure S 10.** Molecular model of cage **C1** (C grey, N blue, O red, Pd turquoise, Ru green). Calculated bond lengths and distances (Å): Ru–N 1.93302 – 2.12342, Pd–N 2.05894 – 2.06110, Pd···Pd 10.91408. The span of the cage is 44.17090 Å and the opposing inner C-atoms have a distance of 11.82282 Å.



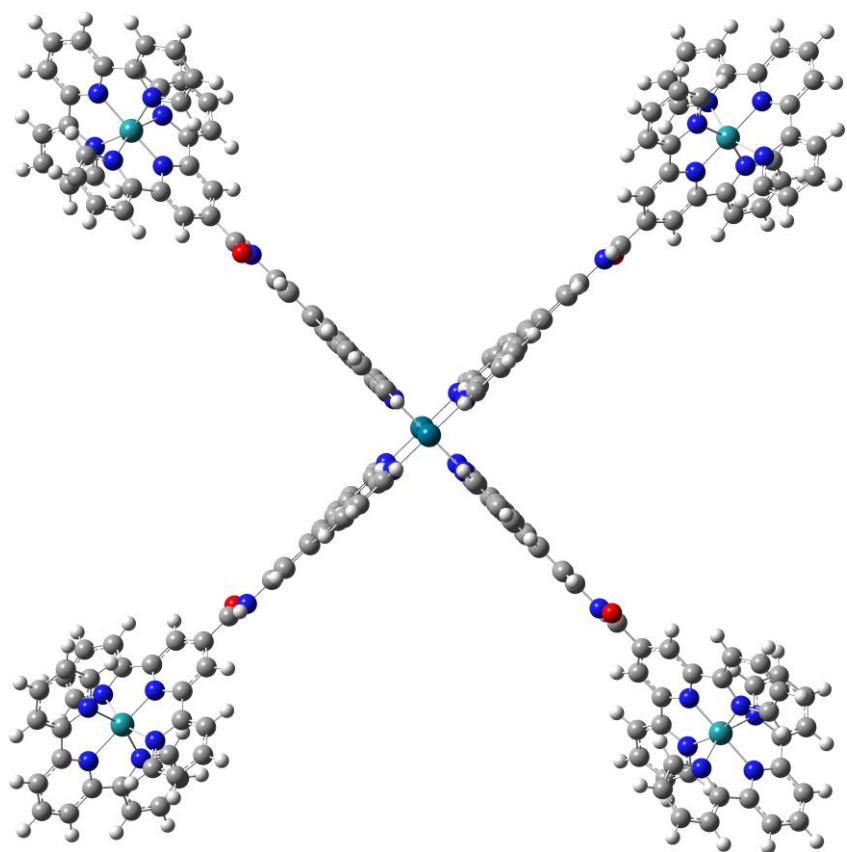

**Figure S 11.** Molecular model of cage **C1** (view through Pd...Pd axis, C grey, N blue, O red, Pd turquoise, Ru green).

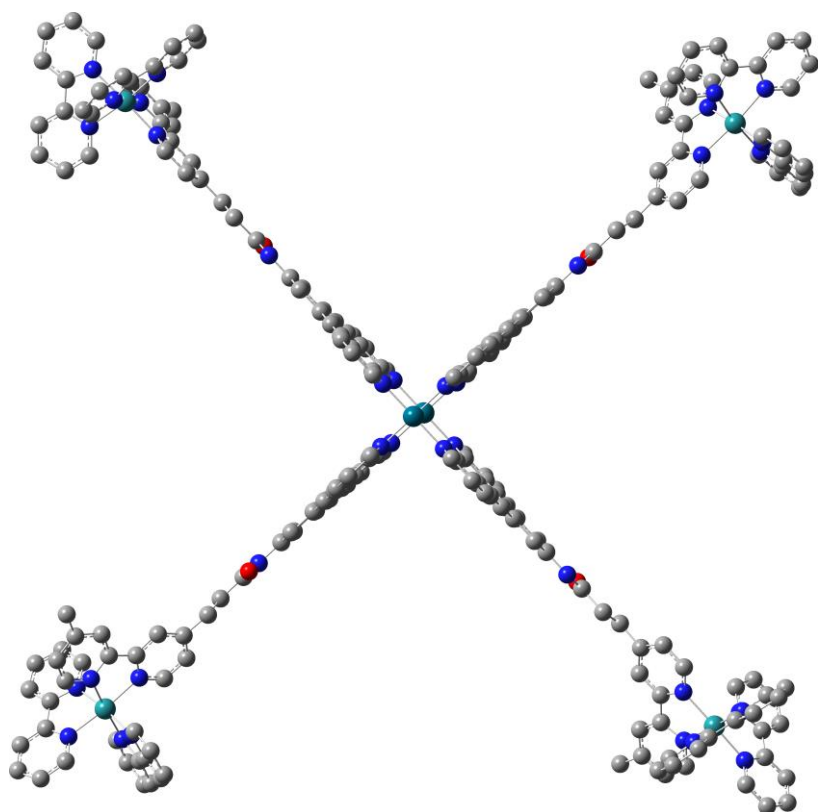

**Figure S 12.** Molecular model of cage **C2** (view through Pd...Pd axis, C grey, N blue, O red, Pd turquoise, Ru green). Calculated bond lengths and distances (Å): Ru–N 2.11481 – 2.13877, Pd–N 2.05446 – 2.05933, Pd...Pd 11.05782. The span of the cage is 49.44370 Å and the opposing inner C-atoms have a distance of 11.69400 Å.

## 6. UV/vis, excitation and emission spectroscopy

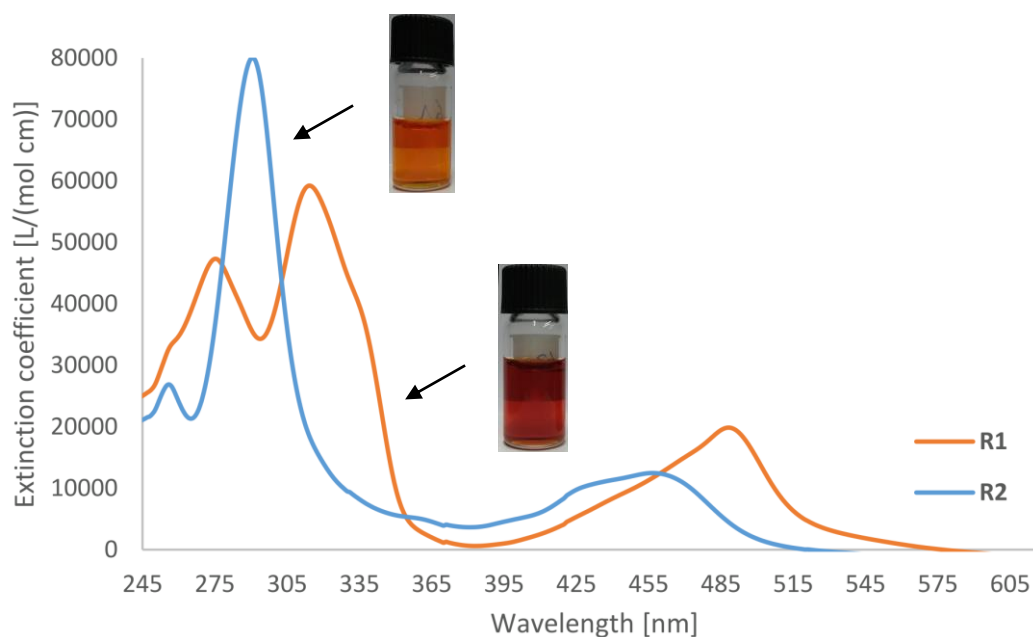

**Figure S 13.** UV-Vis spectra of ruthenium complexes **R1** and **R2** in DMSO ( $c = 10^{-5}$  M). Insets: Photographs of DMSO solutions.

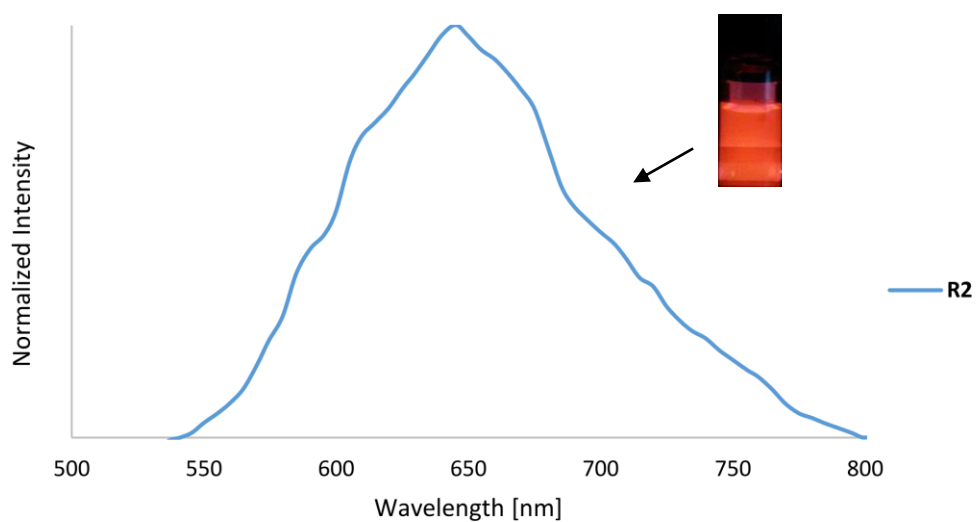

**Figure S 14.** Emission spectrum of ruthenium complex **R2** in DMSO ( $c = 10^{-5}$  M,  $\lambda_{\text{ex}} = 260$  nm). Insets: Photographs of DMSO solutions with UV light irradiation ( $\lambda_{\text{ex}} = 365$  nm).

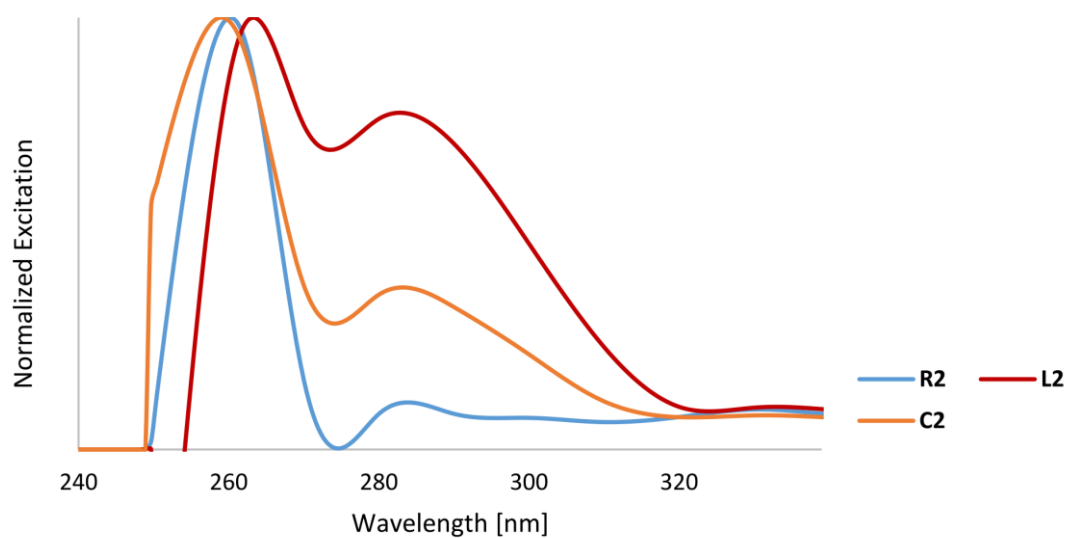

**Figure S 15.** Excitation spectra of ruthenium complex **R2**, ligand **L2** and cage **C2** in DMSO ( $c = 10^{-5}$  M).

## References

- 1 S. H. Wadman, J. M. Kroon, K. Bakker, R. W. A. Havenith, van Klink, Gerard P. M. and G. van Koten, *Organometallics*, 2010, **29**, 1569.
- 2 A. Schmidt, V. Molano, M. Hollering, A. Pöthig, A. Casini and F. E. Kühn, *Chem. Eur. J.*, 2016, **22**, 2253.
- 3 *World Pat.*, WO2003055477 A1, 2003.
- 4 a) Y. Cohen, L. Avram, L. Frish, *Angew. Chem. Int. Ed.* **2005**, *44*, 520–554. b) D. Li, G. Kagan, R. Hopson, P. G. Williard, *J. Am. Chem. Soc.* **2009**, *131*, 5627–5634.
- 5 APEX suite of crystallographic software. APEX 2 Version 2008.4. Bruker AXS Inc., Madison, Wisconsin, USA (2008).
- 6 SAINT, Version 7.56a and SADABS Version 2008/1. Bruker AXS Inc., Madison, Wisconsin, USA (2008).
- 7 Sheldrick, G. M. "SHELXS-97", Program for Crystal Structure Solution, Göttingen, (1997).
- 8 Huebschle, C. B., Sheldrick, G. M. & Dittrich, B. "SHELXLE", *J. Appl. Cryst.* **2011**, *44*, 1281- 1284.
- 9 Sheldrick, G. M. "SHELXL-2014", University of Göttingen, Göttingen, Germany, (2014).
- 10 Sheldrick, G. M. "SHELXL-97", University of Göttingen, Göttingen, Germany, (1998).
- 11 International Tables for Crystallography, Vol. C, Tables 6.1.1.4 (pp. 500-502), 4.2.6.8 (pp. 219-222), and 4.2.4.2 (pp. 193-199), Wilson, A. J. C., Ed., Kluwer Academic Publishers, Dordrecht, The Netherlands, 1992.
- 12 Spek, A. L. "PLATON", A Multipurpose Crystallographic Tool, Utrecht University, Utrecht, The Netherlands, (2010).
- 13 Frisch, M. J.; Trucks, G. W.; Schlegel, H. B.; Scuseria, G. E.; Robb, M. A.; Cheeseman, J. R.; Scalmani, G.; Barone, V.; Mennucci, B.; Petersson, G. A.; Nakatsuji, H.; Caricato, M.; Li, X.; Hratchian, H. P.; Izmaylov, A. F.; Bloino, J.; Zheng, G.; Sonnenberg, J. L.; Hada, M.; Ehara, M.; Toyota, K.; Fukuda, R.; Hasegawa, J.; Ishida, M.; Nakajima, T.; Honda, Y.; Kitao, O.; Nakai, H.; Vreven, T.; Montgomery, J. A.; Jr., J. E. P.; Ogliaro, F.; Bearpark, M.; Heyd, J. J.; Brothers, E.; Kudin, K. N.; Staroverov, V. N.; Kobayashi, R.; Normand, J.; Raghavachari, K.; Rendell, A.; Burant, J. C.; Iyengar, S. S.; Tomasi, J.; Cossi, M.; Rega, N.; Millam, J. M.; Klene, M.; Knox, J. E.; Cross, J. B.; Bakken, V.; Adamo, C.; Jaramillo, J.; Gomperts, R.; Stratmann, R. E.; Yazyev, O.; Austin, A. J.; Cammi, R.; Pomelli, C.; Ochterski, J. W.; Martin, R. L.; Morokuma, K.; Zakrzewski, V. G.; Voth, G. A.; Salvador, P.; Dannenberg, J. J.; Dapprich, S.; Daniels, A. D.; Farkas, Ö.; Foresman, J. B.; Ortiz, J. V.; Cioslowski, J.; Fox, D. J. *Gaussian 09, Revision D.01*, Gaussian Inc., Wallingford CT, 2009.
- 14 Stewart, J. J. P., *J. Mol. Model.* **2007**, *13*, 1173-1213.
